# Supplementary material
Source: publisher figshare collection journal article supplement (https://asha.figshare.com/articles/dataset/_/25328704)
Supplement: Supplementary file 1 [file 1]

**Supplemental Material S2.** Details of the best-fitted binomial generalized linear models for the identification task, including associated power analyses (calculated using the powersim function in the SIMR package).

| <b>Auditory status effect</b>                      |                 |                  |                  |                |                    |              |
|----------------------------------------------------|-----------------|------------------|------------------|----------------|--------------------|--------------|
| <i>Random effect</i>                               |                 | <i>Variance</i>  | <i>Std error</i> |                |                    |              |
| Subject                                            | (Intercept)     | 0.1758           | 0.4193           |                |                    |              |
| Residual                                           |                 | 0.3719           | 0.6098           |                |                    |              |
| <i>Fixed effect</i>                                | <i>Estimate</i> | <i>Std Error</i> | <i>df</i>        | <i>t value</i> | <i>Pr(&gt; z )</i> | <i>Power</i> |
| (Intercept)                                        | 4.0646          | 0.1352           | 36               | 30.054         | <.0001             |              |
| TH group                                           | 0.3427          | 0.1667           | 36               | 2.055          | 0.0472             | 56.50%       |
| <b>d' without ceiling scores</b>                   |                 |                  |                  |                |                    |              |
| <u>Phonological pairs</u>                          |                 |                  |                  |                |                    |              |
| <i>Fixed effect</i>                                | <i>Estimate</i> | <i>Std Error</i> | <i>df</i>        | <i>t value</i> | <i>Pr(&gt; z )</i> |              |
| TH group                                           | 0.2679          | 0.2529           | 21               | 1.059          | 0.302              |              |
| <u>Phonetic pairs</u>                              |                 |                  |                  |                |                    |              |
| <i>Fixed effect</i>                                | <i>Estimate</i> | <i>Std Error</i> | <i>df</i>        | <i>t value</i> | <i>Pr(&gt; z )</i> |              |
| TH group                                           | 0.3591          | 0.1698           | 22               | 2.114          | 0.04               | 46.50%       |
| <b>Chronological (TH)/Auditory (CI) age effect</b> |                 |                  |                  |                |                    |              |
| <i>Random effect</i>                               |                 | <i>Variance</i>  | <i>Std error</i> |                |                    |              |
| Subject                                            | (Intercept)     | 0.1924           | 0.4387           |                |                    |              |
| Residual                                           |                 | 0.3719           | 0.6098           |                |                    |              |
| <i>Fixed effect</i>                                | <i>Estimate</i> | <i>Std Error</i> | <i>df</i>        | <i>t value</i> | <i>Pr(&gt; z )</i> | <i>Power</i> |
| (Intercept)                                        | 4.0962          | 0.1456           | 35               | 28.133         | <.0001             |              |
| Age group 2                                        | 0.2923          | 0.2059           | 35               | 1.419          | 0.165              | 5.50%        |
| Age group 3                                        | 0.2754          | 0.1984           | 35               | 1.388          | 0.174              | 18.50%       |
