# Supplementary material
Source: publisher figshare collection journal article supplement (https://asha.figshare.com/articles/dataset/_/25328704)
Supplement: Supplementary file 2 [file 1]

**Supplemental Material S1.** Details of the best-fitted binomial generalized linear models for the identification task, with associated power analysis for the fixed effects (powersim function of the SIMR package).

| <b>Auditory status effect</b>                      |                 |                   |                |                    |              |
|----------------------------------------------------|-----------------|-------------------|----------------|--------------------|--------------|
| <i>Random effect</i>                               | <i>Variance</i> | <i>Std error</i>  |                |                    |              |
| Subject                                            | 1.55            | 1.245             |                |                    |              |
| <i>Fixed effect</i>                                | <i>Estimate</i> | <i>Std. Error</i> | <i>z value</i> | <i>Pr(&gt; z )</i> | <i>Power</i> |
| (Intercept)                                        | 2.0582          | 0.3911            | 5.262          | <.0001             |              |
| TH group                                           | 1.8323          | 0.5883            | 3.114          | 0.002              | 96%          |
| Oral vowel                                         | 0.4044          | 0.24              | 1.685          | 0.092              | 36.50%       |
| TH group * Oral vowel                              | 2.2705          | 0.6625            | 3.427          | 0.001              | 82.50%       |
| <b>Chronological (TH)/Auditory (CI) age effect</b> |                 |                   |                |                    |              |
| <i>Random effect</i>                               | <i>Variance</i> | <i>Std error</i>  |                |                    |              |
| Subject                                            | 0.7641          | 0.8747            |                |                    |              |
| <i>Fixed effect</i>                                | <i>Estimate</i> | <i>Std. Error</i> | <i>z value</i> | <i>Pr(&gt; z )</i> | <i>Power</i> |
| (Intercept)                                        | 1.7727          | 0.4378            | 4.049          | <.0001             |              |
| Age group 2                                        | 0.5198          | 0.664             | 0.783          | 0.434              | 15.50%       |
| Age group 3                                        | 0.4677          | 0.8986            | 0.521          | 0.603              | 7.50%        |
| Oral vowel                                         | 0.891           | 0.3489            | 2.553          | 0.011              | 72.50%       |
| TH group                                           | 0.1479          | 0.6182            | 0.239          | 0.811              | 9%           |
| Age group 2 * Oral vowel                           | -1.0257         | 0.5295            | -1.937         | 0.053              | 49.50%       |
| Age group 3 * Oral vowel                           | -0.7722         | 0.7325            | -1.054         | 0.292              | 19%          |
| Age group 2 * TH group                             | 2.052           | 1.0366            | 1.98           | 0.048              | 55.50%       |
| Age group 3 * TH group                             | 3.3185          | 1.459             | 2.275          | 0.023              | 32.50%       |
| Oral vowel * TH group                              | 2.7271          | 1.0901            | 2.502          | 0.012              | 53.50%       |
| Age group 2 * Oral vowel * TH group                | -0.6297         | 1.6051            | -0.392         | 0.695              | 4%           |
| Age group 3 * Oral vowel * TH group                | -2.5567         | 1.9003            | -1.345         | 0.179              | 6%           |
| <b>Cued speech exposure effect (CI)</b>            |                 |                   |                |                    |              |
| <i>Random effect</i>                               | <i>Variance</i> | <i>Std error</i>  |                |                    |              |
| Subject                                            | 0.1             | 0.3164            |                |                    |              |
| <i>Fixed effect</i>                                | <i>Estimate</i> | <i>Std. Error</i> | <i>z value</i> | <i>Pr(&gt; z )</i> | <i>Power</i> |
| (Intercept)                                        | 1.625           | 0.1985            | 8.186          | <.0001             |              |
| CS/CS+                                             | 1.018           | 0.3046            | 3.342          | 0.0008             | 93%          |
| <b>Implantation group effect (CI group)</b>        |                 |                   |                |                    |              |
| <i>Random effect</i>                               | <i>Variance</i> | <i>Std error</i>  |                |                    |              |
| Subject                                            | 0.2417          | 0.4916            |                |                    |              |
| <i>Fixed effect</i>                                | <i>Estimate</i> | <i>Std. Error</i> | <i>z value</i> | <i>Pr(&gt; z )</i> | <i>Power</i> |
| (Intercept)                                        | 3               | 0.2903            | 9              | <.0001             |              |
| CI - late implantation group                       | -0.659          | 0.373             | -2             | 0.077              | 49%          |
